# Supplementary material
Source: Royal Society of Chemistry journal article supplement (doi:10.1039/d6ya00042h)
Supplement: d6ya00042h1.pdf [file d6ya00042h1.pdf]

## Aqueous Polypyrrole:Carboxymethyl Cellulose Conducting Binder for Graphite Electrodes in Lithium-Ion Batteries

Anh Ngoc Tram Mai, Christian Kuss\*

*University of Manitoba*

*Department of Chemistry, 144 Dysart Road, Winnipeg, Manitoba, R3T 2N2 Canada*

\*Email: christian.kuss@umanitoba.ca

### Supporting Information

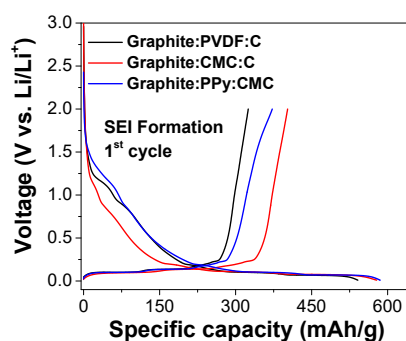

**Figure S1:** 1<sup>st</sup> charge/discharge curves to form SEI of Graphite:PVDF:C, Graphite:CMC:C, and Graphite:PPy:CMC electrodes at 0.1C.

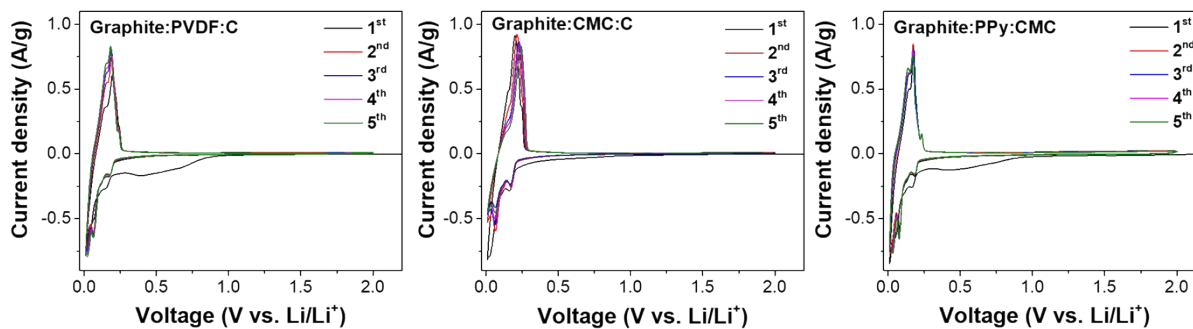

**Figure S2:** Cyclic voltammogram from the 1<sup>st</sup> to 5<sup>th</sup> cycles at 0.1 mV/s of **a)** Graphite:PVDF:C, **b)** Graphite:CMC:C, and **c)** Graphite:PPy:CMC cells.

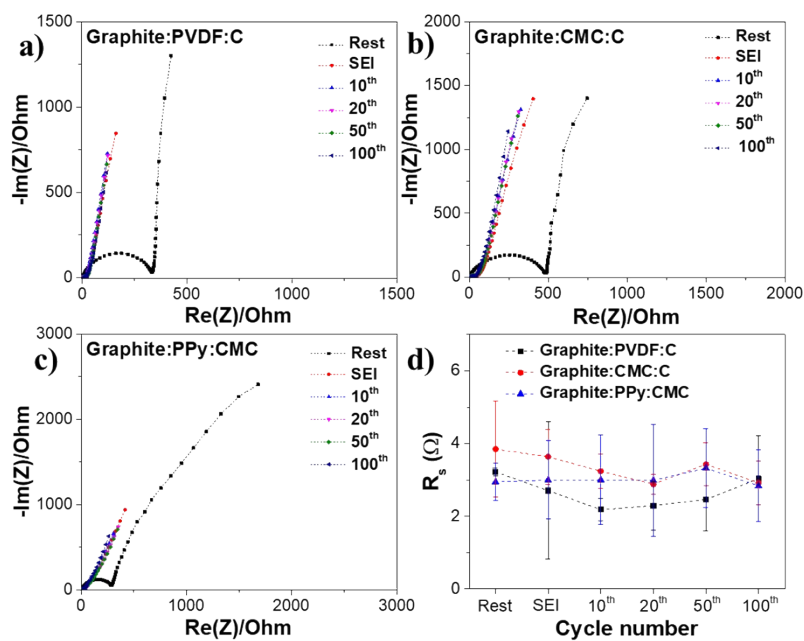

**Figure S3:** Representative Nyquist plots at larger scales of **a)** Graphite:PVDF:C, **b)** Graphite:CMC:C, and **c)** Graphite:PPy:CMC cells; **d)**  $R_s$  values, calculated from EIS results.

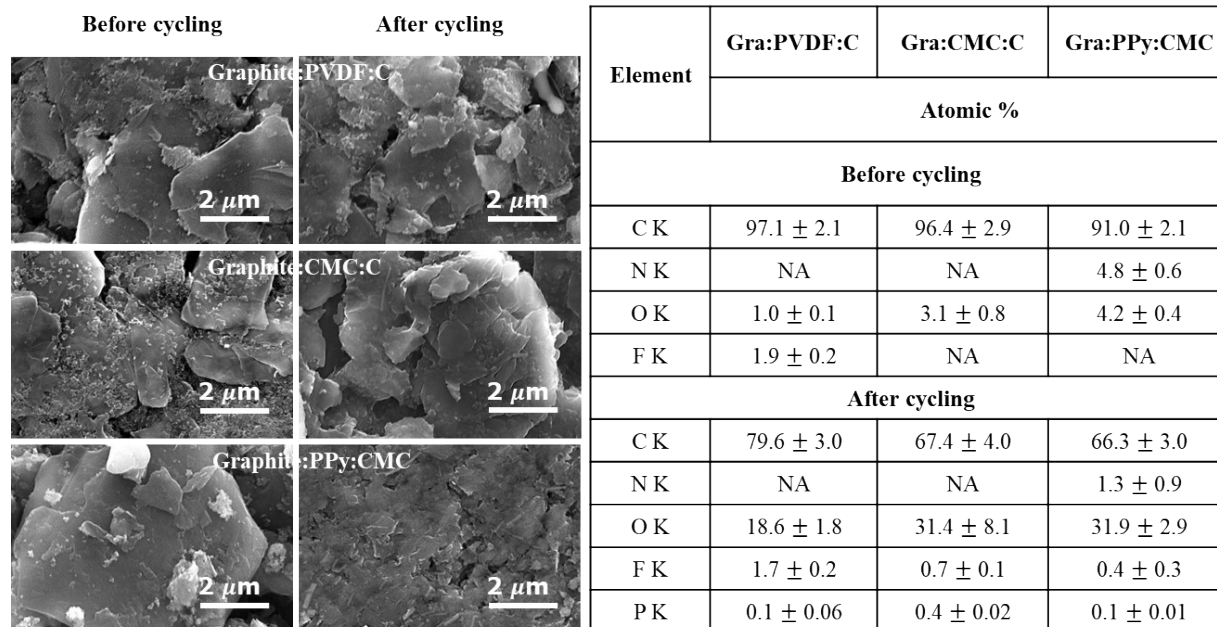

**Figure S4:** SEM images (using ETD detector) and EDX results of Graphite:PVDF:C, Graphite:CMC:C, and Graphite:PPy:C electrodes before and after 100 cycles.

**Table S1:** XPS peak binding energies (eV) and their corresponding compound assignments for Graphite:PVDF:C and Graphite:PPy:C electrodes<sup>1-8</sup>.

| Sample   | Peak  | Graphite:PVDF:C     |                                                                                                              | Graphite:CMC:C      |                                                                                                              | Graphite:PPy:CMC    |                                                                                                              |
|----------|-------|---------------------|--------------------------------------------------------------------------------------------------------------|---------------------|--------------------------------------------------------------------------------------------------------------|---------------------|--------------------------------------------------------------------------------------------------------------|
|          |       | Binding energy (eV) | Assignment                                                                                                   | Binding energy (eV) | Assignment                                                                                                   | Binding energy (eV) | Assignment                                                                                                   |
| Pristine | C 1s  | 284.8               | C-C                                                                                                          | 284.8               | C-C                                                                                                          | 284.8               | C-C/C-H                                                                                                      |
|          |       | 285.0               | C-H                                                                                                          | 285.0               | C-H                                                                                                          | 285.0               | C-N                                                                                                          |
|          |       | 286.0               | C-O/C=O                                                                                                      | 286.8               | C-O                                                                                                          | 286.4               | C-O                                                                                                          |
|          |       | 288.3               | C-F                                                                                                          | 290.2               | C=O                                                                                                          | 291.0               | C=O                                                                                                          |
|          |       | 291.0               | C-F <sub>2</sub>                                                                                             | NA                  | NA                                                                                                           | NA                  | NA                                                                                                           |
| Cycled   | C 1s  | 283.1               | C-Li                                                                                                         | NA                  | NA                                                                                                           | 282.5               | C-Li                                                                                                         |
|          |       | 284.8               | C-C/C-H                                                                                                      | 284.8               | C-C/C-H                                                                                                      | 284.8               | C-C/C-H                                                                                                      |
|          |       | 286.8               | C-O                                                                                                          | 285.7               | C-O                                                                                                          | 286.8               | C-O                                                                                                          |
|          |       | 289.1               | ROLi/<br>ROCO <sub>2</sub> Li                                                                                | 285.8               | C=O                                                                                                          | 288.4               | C=O                                                                                                          |
|          |       | 290.4               | C-F/Li <sub>2</sub> CO <sub>3</sub>                                                                          | 290.3               | C-O=C/<br>Li <sub>2</sub> CO <sub>3</sub> /<br>ROCO <sub>2</sub> Li                                          | 289.8               | Li <sub>2</sub> CO <sub>3</sub> /<br>ROCO <sub>2</sub> Li                                                    |
| Pristine | O 1s  | 531.8               | C=O                                                                                                          | 533.2               | C=O                                                                                                          | 532.0               | C=O                                                                                                          |
|          |       | 533.3               | C-O                                                                                                          | 533.8               | C-O/C-OH                                                                                                     | 533.5               | C-O/C-OH                                                                                                     |
|          |       | NA                  | NA                                                                                                           | 536.2               | C-O-C                                                                                                        | 533.8               | C-O-C                                                                                                        |
| Cycled   | O 1s  | 531.4               | ROLi                                                                                                         | 529.3               | ROLi                                                                                                         | 531.3               | ROLi                                                                                                         |
|          |       | 532.1               | C=O/<br>Li <sub>2</sub> CO <sub>3</sub>                                                                      | 533.1               | C=O/<br>Li <sub>2</sub> CO <sub>3</sub>                                                                      | 532.0               | C=O/<br>Li <sub>2</sub> CO <sub>3</sub>                                                                      |
|          |       | 533.8               | C-O/<br>Li <sub>x</sub> PO <sub>y</sub> F <sub>z</sub>                                                       | 533.0               | C-O/<br>Li <sub>x</sub> PO <sub>y</sub> F <sub>z</sub>                                                       | 533.8               | C-O/<br>Li <sub>x</sub> PO <sub>y</sub> F <sub>z</sub>                                                       |
| Pristine | F 1s  | 687.9               | CF                                                                                                           | NA                  | NA                                                                                                           | NA                  | NA                                                                                                           |
|          |       | 688.8               | CF <sub>2</sub>                                                                                              |                     |                                                                                                              |                     |                                                                                                              |
| Cycled   | F 1s  | 684.8               | LiF                                                                                                          | 686.1               | LiF                                                                                                          | 684.7               | LiF                                                                                                          |
|          |       | 686.0               | CF                                                                                                           | NA                  | NA                                                                                                           | NA                  | NA                                                                                                           |
|          |       | 687.4               | Li <sub>x</sub> PO <sub>y</sub> F <sub>z</sub> /<br>Li <sub>x</sub> PF <sub>y</sub>                          | 688.6               | Li <sub>x</sub> PO <sub>y</sub> F <sub>z</sub> /<br>Li <sub>x</sub> PF <sub>y</sub>                          | 686.6               | Li <sub>x</sub> PO <sub>y</sub> F <sub>z</sub> /<br>Li <sub>x</sub> PF <sub>y</sub>                          |
| Cycled   | P 2p  | 134.1               | Li <sub>x</sub> PO <sub>y</sub> F <sub>z</sub>                                                               | 133.3               | Li <sub>x</sub> PO <sub>y</sub> F <sub>z</sub> /<br>Li <sub>x</sub> PF <sub>y</sub>                          | 134.0               | Li <sub>x</sub> PO <sub>y</sub> F <sub>z</sub>                                                               |
|          |       | 136.9               | Li <sub>x</sub> PF <sub>y</sub>                                                                              |                     |                                                                                                              | 136.8               | Li <sub>x</sub> PF <sub>y</sub>                                                                              |
| Cycled   | Li 1s | 54.6                | Li <sub>2</sub> O                                                                                            | 54.5                | Li <sub>2</sub> O                                                                                            | 54.5                | Li <sub>2</sub> O                                                                                            |
|          |       | 55.4                | Li <sub>2</sub> CO <sub>3</sub> /<br>ROCO <sub>2</sub> Li/<br>Li <sub>x</sub> PO <sub>y</sub> F <sub>z</sub> | 55.3                | Li <sub>2</sub> CO <sub>3</sub> /<br>ROCO <sub>2</sub> Li/<br>Li <sub>x</sub> PO <sub>y</sub> F <sub>z</sub> | 55.5                | Li <sub>2</sub> CO <sub>3</sub> /<br>ROCO <sub>2</sub> Li/<br>Li <sub>x</sub> PO <sub>y</sub> F <sub>z</sub> |
|          |       | 56.3                | LiF                                                                                                          | 56.2                | LiF                                                                                                          | 56.4                | LiF                                                                                                          |
| Pristine | N 1s  | NA                  | NA                                                                                                           | NA                  | NA                                                                                                           | 399.8               | C-N                                                                                                          |
| Cycled   | N 1s  | NA                  | NA                                                                                                           | NA                  | NA                                                                                                           | 399.6               | C-N                                                                                                          |

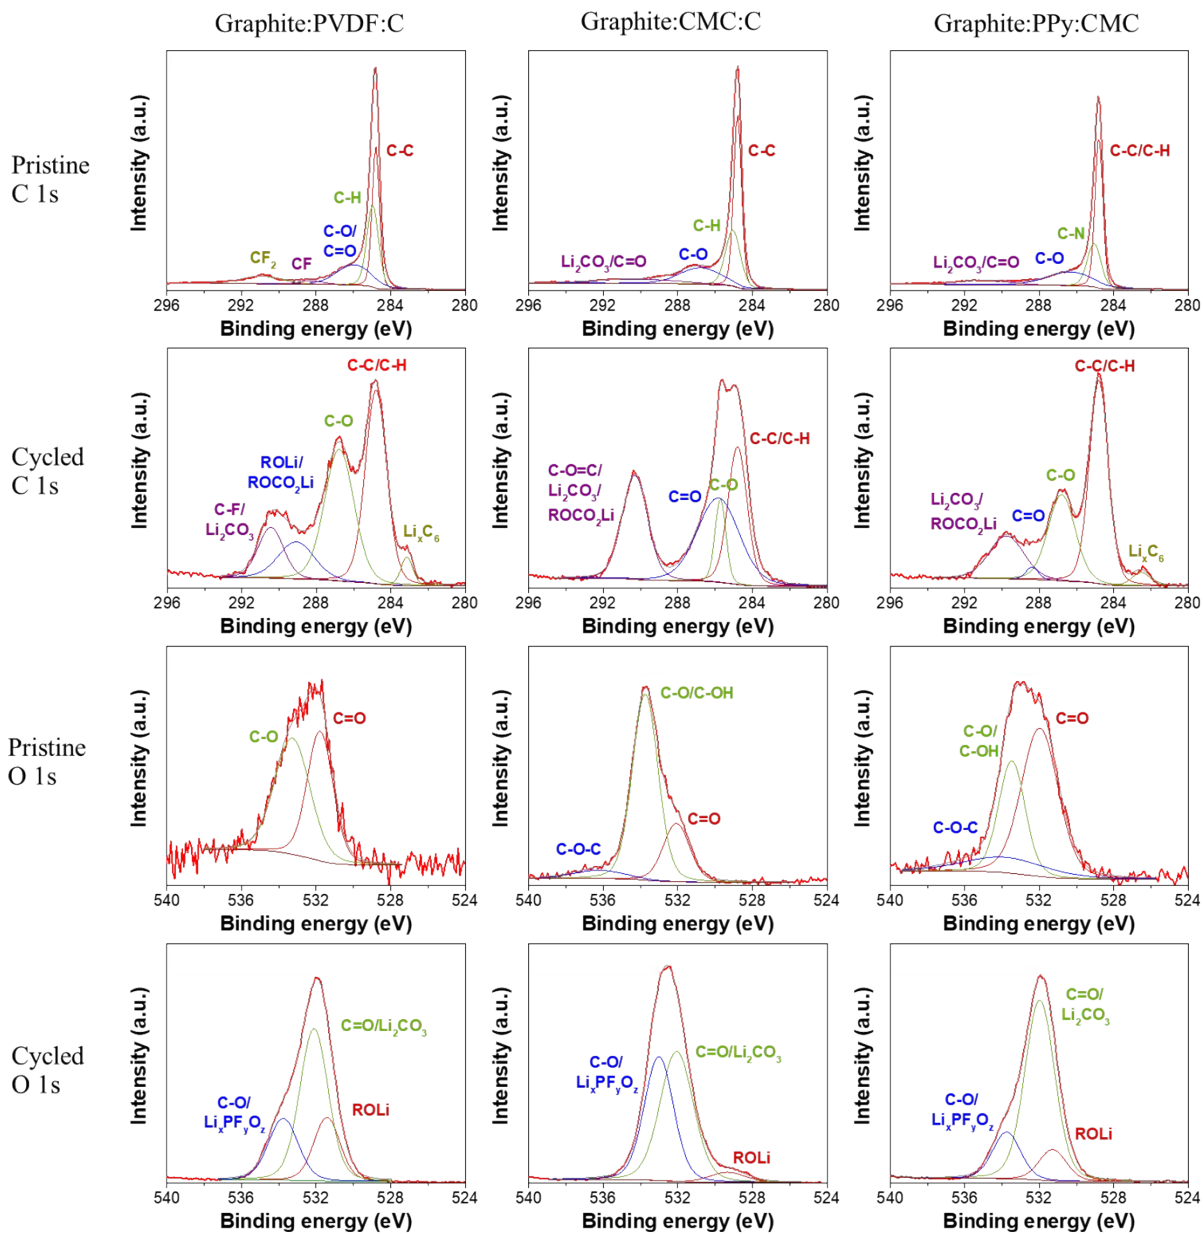

**Figure S5:** C 1s and O 1s XPS spectra of Graphite:PVDF:C, Graphite:CMC:C, and Graphite:PPy:CMC electrodes before and after 100 cycles at 0.5C.

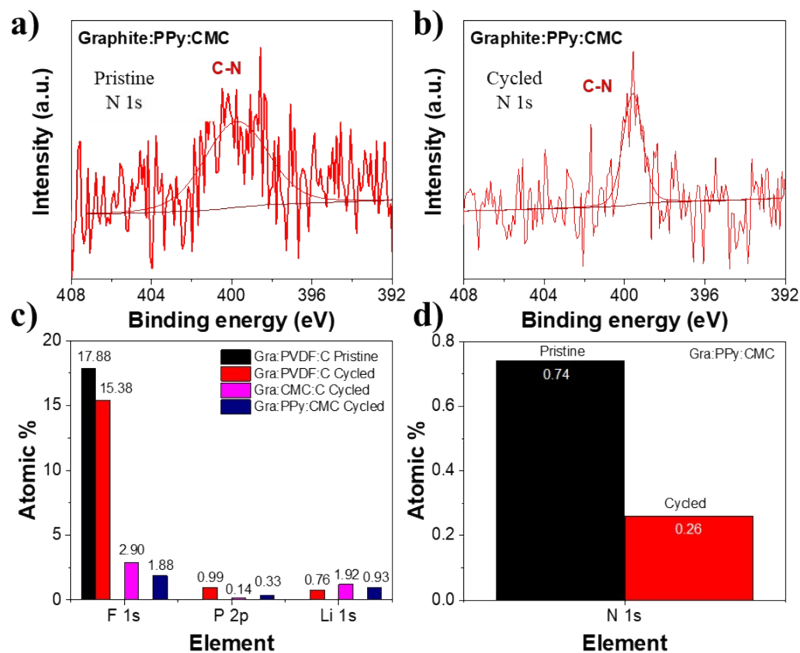

**Figure S6:** XPS spectra of N 1s of a Graphite:PPy:CMC electrode **a)** before cycling and **b)** after 100 cycles at 0.5C; **c)** atomic percentage of F, P, and Li, calculated based on the area of F 1s, P 2p, and Li 1s peaks in the survey spectra of Graphite:PVDF:C: Graphite:CMC:C, and Graphite:PPy:CMC; **d)** atomic percentage of N calculated based on the area of N 1s peak in the survey spectra of Graphite:PPy:CMC.

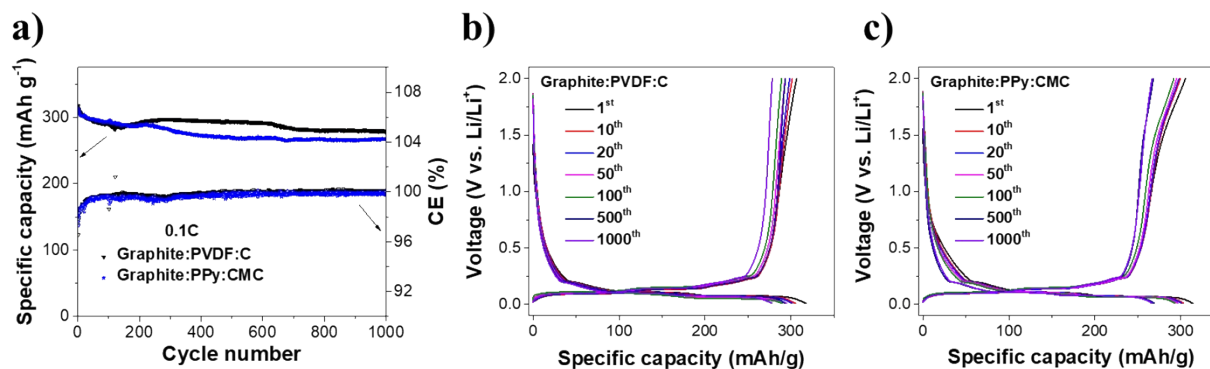

**Figure S7:** Cycling profile of Graphite:PVDF:C and Graphite:PPy:CMC for 1000 cycles at 0.1C.

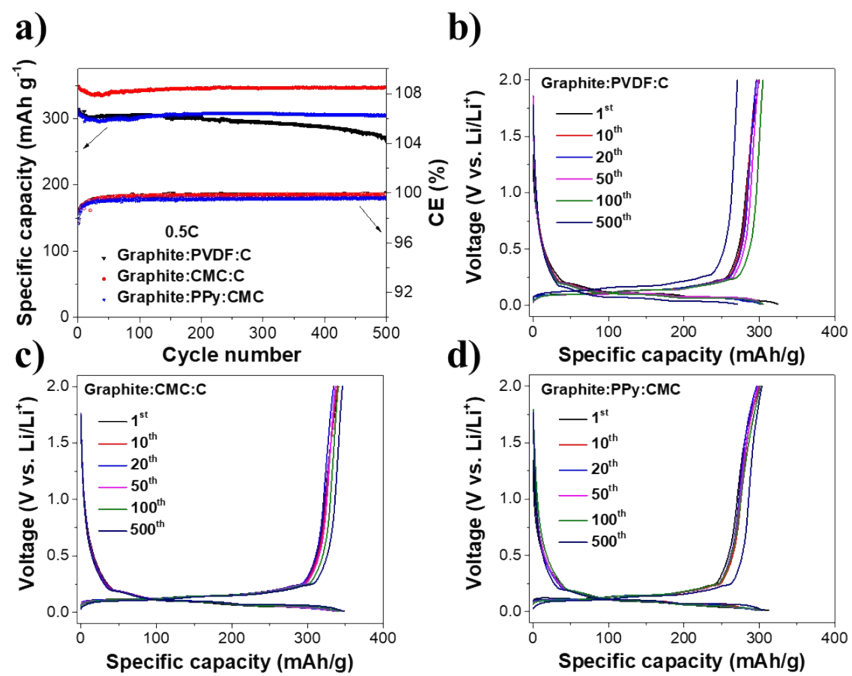

**Figure S8:** Cycling profile of Graphite:PVDF:C, Graphite:CMC:C, and Graphite:PPy:CMC for 500 cycles at 0.5C.

## References

- 1 Zhao, Z.-X. *et al.* Promoting the Normal- and Low-Temperature Performances of Natural Graphite by the F-Doping Derived from PVDF Modification. *ACS Applied Electronic Materials* **4**, 4936-4946, doi:10.1021/acsaelm.2c00939 (2022).
- 2 Huang, L. *et al.* Insight into the Role of Fluoroethylene Carbonate in Solid Electrolyte Interphase Construction for Graphite Anodes of Lithium-Ion Batteries. *The Journal of Physical Chemistry C* **128**, 9586-9594, doi:10.1021/acs.jpcc.4c02475 (2024).
- 3 Chen, M. *et al.*  $\pi$ - $\pi$  electron-donor-acceptor (EDA) interaction enhancing adsorption of tetracycline on 3D PPY/CMC aerogels. *Chemical Engineering Journal* **454**, doi:10.1016/j.cej.2022.140300 (2023).
- 4 Malmgren, S. *et al.* Consequences of air exposure on the lithiated graphite SEI. *Electrochimica Acta* **105**, 83-91, doi:10.1016/j.electacta.2013.04.118 (2013).
- 5 Pham, H. Q., Mirolò, M., Tarik, M., El Kazzi, M. & Trabesinger, S. Multifunctional electrolyte additive for improved interfacial stability in Ni-rich layered oxide full-cells. *Energy Storage Materials* **33**, 216-229, doi:10.1016/j.ensm.2020.08.026 (2020).
- 6 Allgayer, F., Maibach, J. & Jeschull, F. Comparing the Solid Electrolyte Interphases on Graphite Electrodes in K and Li Half Cells. *ACS Applied Energy Materials* **5**, 1136-1148, doi:10.1021/acsaem.1c03491 (2022).
- 7 Światowska, J. *et al.* XPS, XRD and SEM characterization of a thin ceria layer deposited onto graphite electrode for application in lithium-ion batteries. *Applied Surface Science* **257**, 9110-9119, doi:10.1016/j.apsusc.2011.05.108 (2011).
- 8 Zhu, T. *et al.* Manipulating the Composition and Structure of Solid Electrolyte Interphase at Graphite Anode by Adjusting the Formation Condition. *Energy Technology* **7**, doi:10.1002/ente.201900273 (2019).
